# Supplementary material for: Effect of ovariectomy on proximal tibia metaphysis and lumbar vertebral body in common marmoset monkeys
Source: Copernicus journal article supplement (doi:10.5194/pb-6-65-2019), 2019-07-12
Supplement: Supplementary file 1 [file Data for Primate Biology_Figures_3to5.xls]

## Sheet: Data _Figures 3 to 5
Data figures 3 to 5: body mass and total bone mineral densities (BMD´s) in proximal tibia and second last lumbar vertebra (L5/L6) of female marmoset monkeys before, and 1,3,6 and 12 months after ovariectomy (ovx)
Animal ID	Symbol	body mass (g)	months after ovx	BMD in proximal Tibia (mg/cm³)	BMD in L5/L6 (mg/cm³)
304	triangle up	450	0	346.467	452.733
304	triangle up	379	1	391.4	423.467
304	triangle up	400	3	361.7	383.933
304	triangle up	376	6	331.733	513.933
304	triangle up	364	12	–	–
397	triangle down	442	0	503	428.667
397	triangle down	428	1	378.333	489.1
397	triangle down	427	3	406.8	443.233
397	triangle down	447	6	422.667	476.6
397	triangle down	535	12	451	475.933
431	circle	335	0	425.633	365.967
431	circle	356	1	345.1	419
431	circle	342	3	307.8	406.567
431	circle	347	6	375.433	363.6
431	circle	346	12	243.067	317.867
500	square	342	0	335.967	424.867
500	square	308	1	389.3	421.567
500	square	300	3	388.433	396.367
500	square	309	6	305.6	443.267
500	square	290	12	262.633	380.733
501	diamond	410	0	432.767	451.133
501	diamond	413	1	373.067	469.467
501	diamond	400	3	344.7	418.8
501	diamond	395	6	330.433	380.5
501	diamond	400	12	258.9	372.433
519	hexagon	437	0	420.633	494.867
519	hexagon	431	1	509.7	491.767
519	hexagon	439	3	512.8	475.1
519	hexagon	474	6	455.133	513.933
519	hexagon	491	12	401.3	509.133
