# Supplementary material for: Effect of ovariectomy on proximal tibia metaphysis and lumbar vertebral body in common marmoset monkeys
Source: Copernicus journal article supplement (doi:10.5194/pb-6-65-2019), 2019-07-12
Supplement: Supplementary file 2 [file data_additional_Figures 1-3.xls]

## Sheet: Tabelle1
Additional figures 1 to 3: body mass of intact female marmoset monkeys 6 and 18 months after having their last litter
running number	category	maternal date of birth	last litter before retirement			maternal body mass 6 months post partum (g)	maternal body mass 18 months post partum (g)
			date of giving birth	age when giving birth (years)	litter size (N)
1	overweight (>450g)	2012-10-08	2016-04-08	3	2	449	487
2	overweight (>450g)	2009-04-19	2012-06-21	3	1	465	430
3	overweight (>450g)	2006-06-20	2011-12-20	5	3	465	465
4	overweight (>450g)	2006-07-05	2011-10-16	5	3	466	563
5	overweight (>450g)	2009-04-12	2012-01-22	2	3	467	365
6	overweight (>450g)	2008-11-21	2011-05-12	2	1	475	470
7	overweight (>450g)	2007-07-25	2015-10-21	8	2	483	482
8	overweight (>450g)	2005-10-07	2014-04-21	8	1	519	530
9	overweight (>450g)	2010-11-23	2015-08-20	4	2	520	525
10	overweight (>450g)	2010-03-05	2016-07-23	6	1	565	543
11	overweight (>450g)	2009-05-08	2013-03-23	3	3	586	530
12	normal weight (<450g)	2005-03-05	2012-08-22	7	3	295	311
13	normal weight (<450g)	2008-09-17	2012-06-02	3	3	336	363
14	normal weight (<450g)	2008-09-27	2012-05-21	3	4	370	466
15	normal weight (<450g)	2009-04-19	2011-12-13	2	2	371	435
16	normal weight (<450g)	2011-05-11	2015-11-22	4	2	382	395
17	normal weight (<450g)	2008-08-07	2013-03-01	4	3	382	424
18	normal weight (<450g)	2008-10-30	2012-07-04	3	3	411	441
19	normal weight (<450g)	2012-03-16	2015-10-21	3	2	414	551
20	normal weight (<450g)	2010-12-20	2016-06-28	5	2	423	448
21	normal weight (<450g)	2008-09-23	2016-05-16	7	2	423	463
22	normal weight (<450g)	2008-09-09	2012-06-25	3	3	429	553
23	normal weight (<450g)	2005-12-02	2014-08-26	8	2	441	474
