# Supplementary material for: Effect of ovariectomy on proximal tibia metaphysis and lumbar vertebral body in common marmoset monkeys
Source: Copernicus journal article supplement (doi:10.5194/pb-6-65-2019), 2019-07-12
Supplement: Supplementary file [file pb-6-65-2019-supplement-title-page.pdf › pb-6-65-2019-supplement-title-page.pdf]

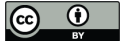

## *Supplement of*

# **Effect of ovariectomy on proximal tibia metaphysis and lumbar vertebral body in common marmoset monkeys**

**Christina Schlumbohm et al.**

*Correspondence to:* Christina Schlumbohm (cschlumb@gmx.de)

- pb-6-65-2019-supplement-title-page.pdf
- Data for Primate Biology\_Figures\_3to5.xls
- data\_additional\_Figures 1-3.xls

The copyright of individual parts of the supplement might differ from the CC BY 4.0 License.
